# Supplementary material
Source: Springer Nature journal article supplement (https://www.springermedizin.de/resource/supplementary/12986_2009_221_MOESM3_ESM.pdf/25655794)

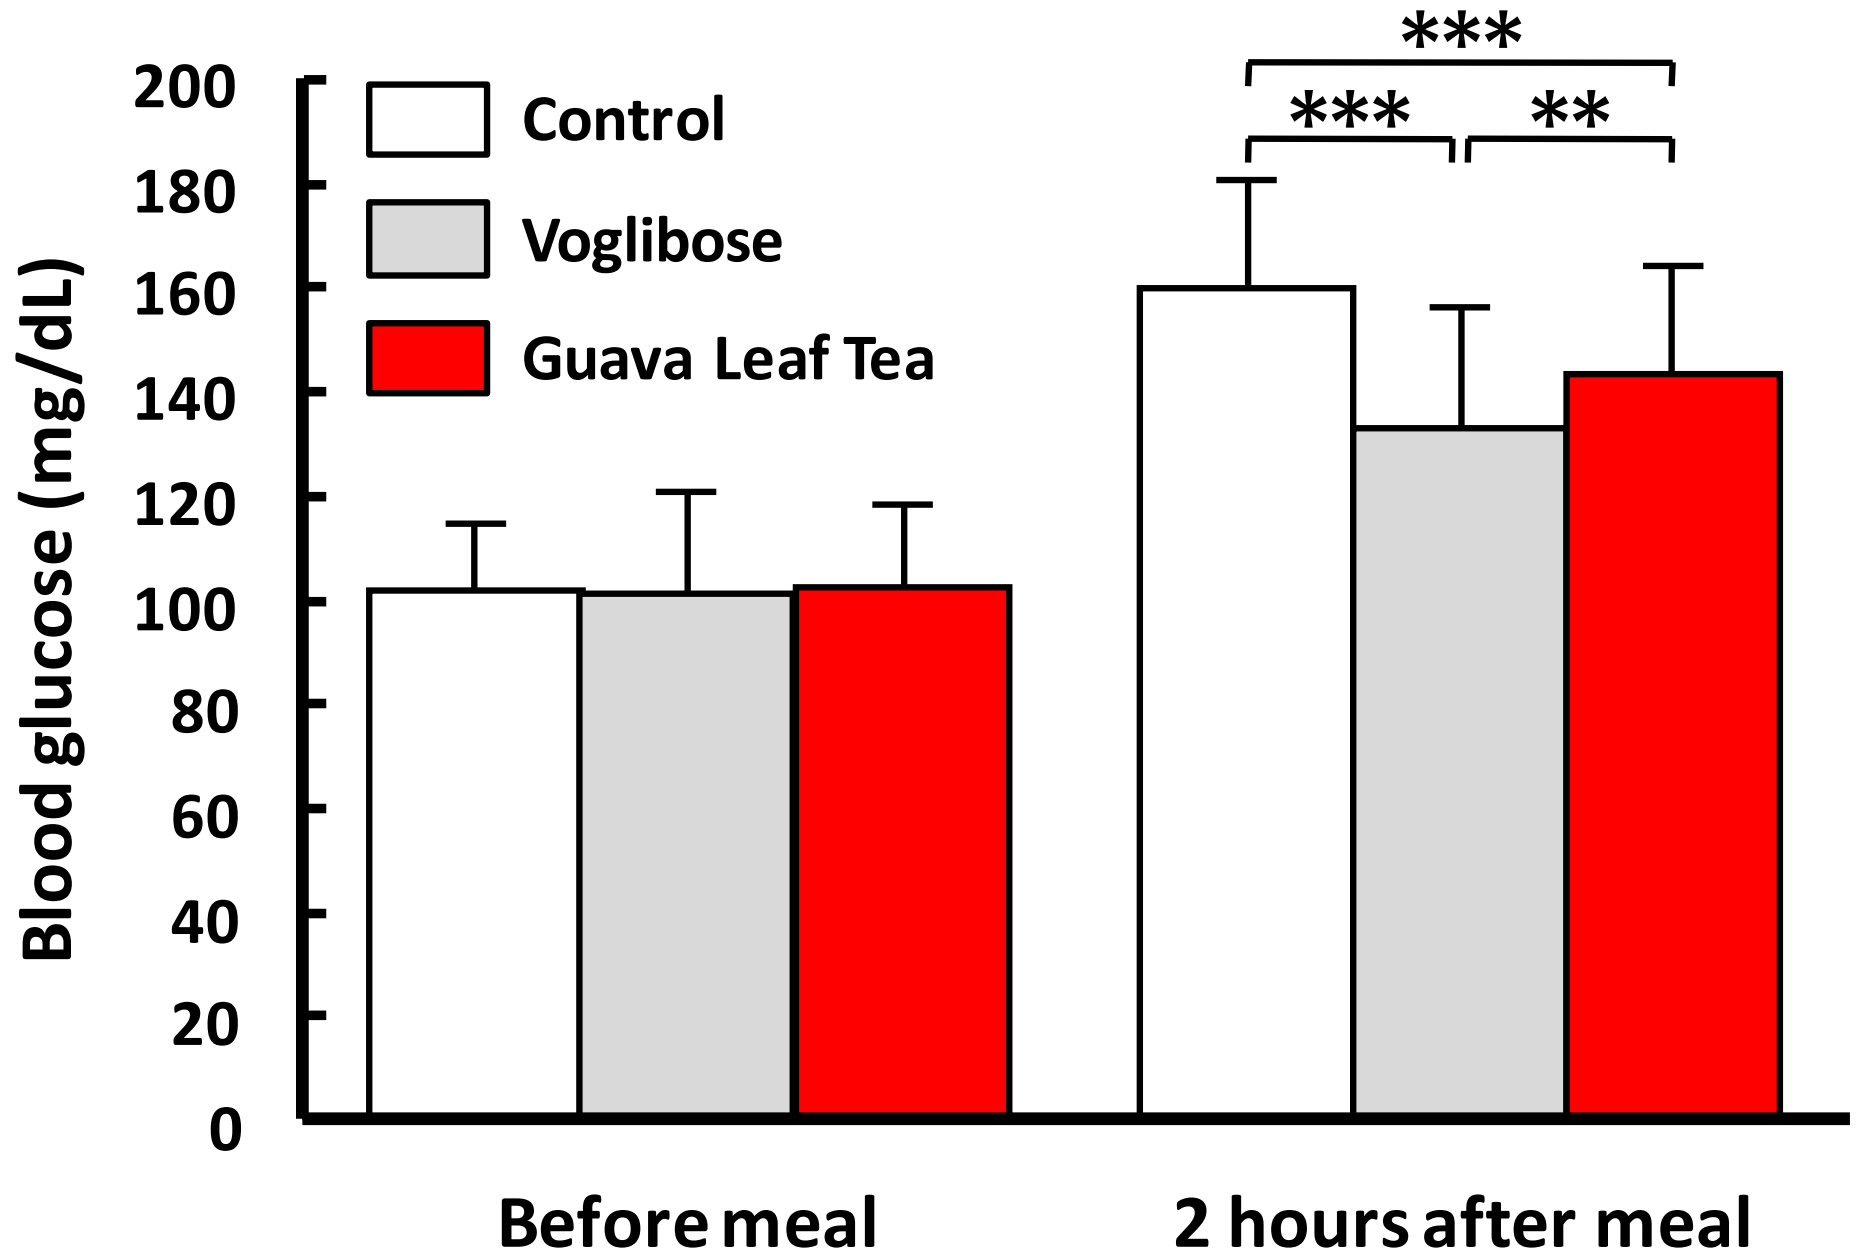

Supplement: MOESM3 [file 25655794]
